# Supplementary material for: A new chemosensor that signals Hg(ii), Cu(ii) and Zn(ii) at different emission wavelengths: selectivity toward Hg(ii) in acetonitrile
Source: Royal Society of Chemistry journal article supplement (doi:10.1039/b9nj00204a), 2009-01-01
Supplement: b9nj00204a.pdf [file b9nj00204a.pdf]

## **Supporting Information**

### **A New Chemosensor that Signals Hg(II), Cu(II) and Zn(II) at Different Emission Wavelengths: Selectivity toward Hg(II) in Acetonitrile**

*B. Nisar Ahamed, I. Ravikumar and Pradyut Ghosh\**

Department of Inorganic Chemistry, Indian Association for the Cultivation of Science,

2A & 2B Raja S. C. Mullick Road, Kolkata 700032, India

E-mail: [icpg@iacs.res.in](mailto:icpg@iacs.res.in)

| <b>Contents</b>                                                                       | <b>Page no.</b> |
|---------------------------------------------------------------------------------------|-----------------|
| <b>Experimental Details.</b> .....                                                    | <b>S3</b>       |
| <b>Scheme1.</b> Synthesis and characterization <b>1</b> .....                         | <b>S4</b>       |
| <b>Scheme2.</b> Synthesis and characterization of <b>2</b> .....                      | <b>S5</b>       |
| <b>Scheme3.</b> Synthesis and characterization of <b>3</b> .....                      | <b>S7</b>       |
| <b>Figure S1.</b> <sup>1</sup> H NMR spectrum of <b>1</b> in CDCl <sub>3</sub> .....  | <b>S9</b>       |
| <b>Figure S2.</b> <sup>13</sup> C NMR spectrum of <b>1</b> in CDCl <sub>3</sub> ..... | <b>S10</b>      |
| <b>Figure S3.</b> HRMS spectrum of <b>1</b> .....                                     | <b>S11</b>      |

|                                                                                                                                                                                                                 |            |
|-----------------------------------------------------------------------------------------------------------------------------------------------------------------------------------------------------------------|------------|
| <b>Figure S4.</b> $^1\text{H}$ NMR spectrum of <b>2</b> in $\text{CDCl}_3$ .....                                                                                                                                | <b>S12</b> |
| <b>Figure S5.</b> $^{13}\text{C}$ NMR spectrum of <b>2</b> in $\text{CDCl}_3$ .....                                                                                                                             | <b>S13</b> |
| <b>Figure S6.</b> HRMS spectrum of <b>2</b> .....                                                                                                                                                               | <b>S14</b> |
| <b>Figure S7.</b> $^1\text{H}$ -NMR spectrum of <b>3</b> in $\text{CDCl}_3$ .....                                                                                                                               | <b>S15</b> |
| <b>Figure S8.</b> $^{13}\text{C}$ -NMR spectrum of <b>3</b> in $\text{DMSO-d}_6$ .....                                                                                                                          | <b>S16</b> |
| <b>Figure S9.</b> HRMS spectrum of <b>3</b> .....                                                                                                                                                               | <b>S17</b> |
| <b>Figure S10.</b> Variation of the Emission spectra of <b>2</b> ( $5 \times 10^{-6}$ M) in $\text{CH}_3\text{CN}$ with 100 equiv of $\text{Hg}^{2+}$ , $\text{Cu}^{2+}$ , $\text{Zn}^{2+}$ .....               | <b>S18</b> |
| <b>Figure S11.</b> Fluorescence response of <b>3</b> ( $1 \times 10^{-7}$ M) with various metal ions in THF at 298 K. $\lambda_{\text{exc}} = 368$ nm. ....                                                     | <b>S19</b> |
| <b>Figure S12.</b> Fluorescence response of <b>3</b> ( $1 \times 10^{-7}$ M) with 100 equiv of $\text{Hg}^{2+}$ , $\text{Cu}^{2+}$ , $\text{Zn}^{2+}$ in THF at 298 K. ....<br>$\lambda_{\text{exc}} = 368$ nm. | <b>S20</b> |
| <b>Figure S13.</b> Emission spectra of <b>3</b> ( $1 \times 10^{-7}$ M) in THF with $\text{Hg}^{2+}$ under acidic condition.....                                                                                | <b>S21</b> |
| <b>Figure S14.</b> Fluorometric titration of <b>2</b> ( $5 \times 10^{-6}$ M) with different concentrations of $\text{Zn}^{2+}$ in $\text{CH}_3\text{CN}$ .....                                                 | <b>S22</b> |
| <b>Figure S15.</b> Benesi-Hiderband Linear Plot for <b>2</b> with different concentrations of $\text{Zn}(\text{II})$ at 298 K. ....<br>$\lambda_{\text{exc}} = 315$ nm.                                         | <b>S23</b> |
| <b>Figure S16.</b> Fluorometric titration of <b>2</b> ( $5 \times 10^{-6}$ M) with different concentrations of $\text{Cu}^{2+}$ in $\text{CH}_3\text{CN}$ .....                                                 | <b>S24</b> |

|                                                                                                                                                                                 |            |
|---------------------------------------------------------------------------------------------------------------------------------------------------------------------------------|------------|
| <b>Figure S17.</b> Benesi-Hiderband Linear Plot for <b>2</b> with different concentrations of Cu(II) at 298 K. ....                                                             | <b>S25</b> |
| $\lambda_{\text{exc}} = 315 \text{ nm.}$                                                                                                                                        |            |
| <b>Figure S18.</b> Fluorescence response of <b>2</b> ( $5 \times 10^{-6} \text{ M}$ ) with 100 equiv of different metal ions in $\text{CH}_3\text{CN}:\text{H}_2\text{O}$ ..... | <b>S26</b> |
| (8:2, v/v) at 298 K. $\lambda_{\text{exc}} = 315 \text{ nm.}$                                                                                                                   |            |
| <b>Figure S19.</b> Fluorescence response of <b>2</b> ( $5 \times 10^{-6} \text{ M}$ ) with 100 equiv of different metal ions in $\text{CH}_3\text{CN}:\text{H}_2\text{O}$ ..... | <b>S27</b> |
| (1:1, v/v) at 298 K. $\lambda_{\text{exc}} = 315 \text{ nm.}$                                                                                                                   |            |
| <b>Figure S20.</b> Emission spectra of <b>2</b> ( $5 \times 10^{-6} \text{ M}$ ) in $\text{CH}_3\text{CN}$ in presence of various $\text{H}^+$ concentration .....              | <b>S28</b> |
| <b>Methods</b> .....                                                                                                                                                            | <b>S29</b> |
| <b>References</b> .....                                                                                                                                                         | <b>S29</b> |

## Experimental Details.

**Materials and Methods:** Tris-(2-aminoethyl)amine (tren), 2-Chloromethylquinoline hydrochloride, 9-Hydroxymethyl anthracene, perchlorate salts of Cu(II), Zn(II), Cd(II), Hg(II), Li(I), Na(I), K(I), Ag(I), Ca(II) and nitrate salt of Ni(II) were purchased from Aldrich and were used directly without further purification. Furfuraldehyde, sodium borohydride, potassium carbonate, Phosphorus tribromide, chloroform, methanol, dichloromethane, acetonitrile, toluene and tetrahydrofuran were purchased from S.D. Fine Chemicals, India. Solvents were dried by conventional methods and distilled under  $\text{N}_2$  atmosphere before being used. 9-Bromomethyl anthracene was synthesized as per literature procedure.<sup>1</sup>  $^1\text{H}$  NMR and  $^{13}\text{C}$  NMR spectra were recorded on a Bruker 300 MHz and 75

MHz FT-NMR spectrometers respectively using tetramethylsilane as an internal reference. MS measurements were carried out on a Qtof Micro YA263 HRMS instrument. The absorption spectra were recorded with a Perkin Elmer Lambda 950 UV-VIS-NIR scanning spectrophotometer at 298 K. The fluorescence spectra were recorded using Perkin Elmer LS-55 luminescence spectrophotometer at room temperature. CAUTION: *Perchlorate salts of metal complexes with organic ligands are potentially explosive. All due precautions should be taken.*

### **Synthesis of 1:**

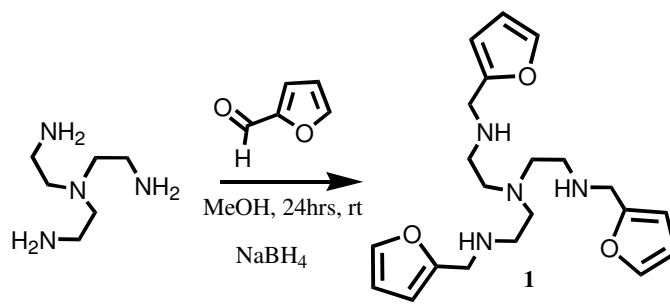

**Scheme 1.** Synthesis of **1**

A dry methanolic solution (50 ml) of Tris-(2-aminoethyl)amine (tren), (0.45 ml, 3 mmol) was added slowly to a stirred solution of furfuraldehyde (0.75 ml, 9 mmol) in dry methanol (75 ml) and the stirring was continued for 24 hours at room temperature under nitrogen atmosphere. After this period, excess of NaBH<sub>4</sub> was added in portions to the stirring solution in ice cold condition; resulting

solution was stirred for 8 hours at room temperature and then refluxed for another 2 hours, the reaction mixture was cooled to rt, the solvent was removed under vacuum and the residue was dissolved in  $\text{CHCl}_3$  and was washed with water (3 x 100 ml), dried over anhydrous  $\text{Na}_2\text{SO}_4$  and evaporated under vacuum to give dark yellowish-brown oil, which was purified by silica gel (stationary phase) column chromatography using Hexane-EtOAc gradient as eluent to afford **1**. Yield: 856.00 mg (74%), Calculated for  $\text{C}_{21}\text{H}_{30}\text{N}_4\text{O}_3$ :  $[\text{M}+\text{H}]^+$   $m/z$  =386.4879, Found: 387.3949;  $^1\text{H-NMR}$   $\delta$  ( $\text{CDCl}_3$ , 300 MHz, ppm): 7.33 (s, 3H, Ar-H), 6.29 (s, 3H, Ar-H), 6.17 (s, 3H, Ar-H), 3.75 (s, 6H,  $\text{ArCH}_2$ ), 2.83 (b, 3H, N-H), 2.64(t, 6H,  $\text{ArCH}_2\text{NCH}_2$ ,  $J = 5.01\text{Hz}$ ), 2.56 (t, 6H,  $\text{ArCH}_2\text{NCH}_2\text{CH}_2\text{N}$ ,  $J = 5.1\text{ Hz}$ ).  $^{13}\text{C}$  NMR ( $\text{CDCl}_3$ , 75MHz, ppm):  $\delta$  45.87, 46.6, 107.11, 108.70,110.15, 141.79, 153.54.

### Synthesis of 2:

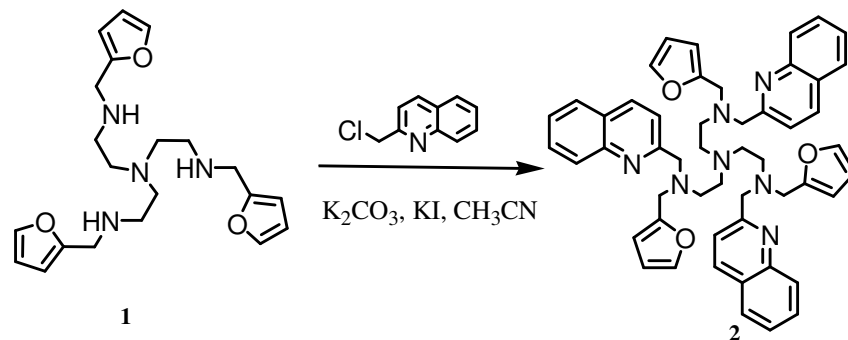

**Scheme 2.** Synthesis of **2**

The ligand **1** (0.500 g, 0.6 mmol) was dissolved in dry CH<sub>3</sub>CN (75 ml) and anhydrous K<sub>2</sub>CO<sub>3</sub> (0.256 g, 1.85 mmol) was added. This suspension was stirred for half an hour at 60°C. To the stirring solution 2-Chloromethylquinoline (0.395g, 1.85 mmol) was added and the mixture was stirred for another 3 hours in presence of catalytic amount of KI. Stirring and refluxing were continued for 24 hrs and then the reaction mixture was allowed to cool to rt. The excess K<sub>2</sub>CO<sub>3</sub> was filtered off and washed with CH<sub>3</sub>CN. Combine filtrates were collected in a round bottom flask and solvent was removed under vacuum and dissolved in CHCl<sub>3</sub>. The chloroform suspension was washed with distilled water (3 x 100 ml). The organic layers were collected and dried over anhydrous Na<sub>2</sub>SO<sub>4</sub> and evaporated to dryness to give a crude product of blackish-yellow semi solid of **2**. This crude product was further purified by silica gel (stationary phase) column chromatography using CHCl<sub>3</sub>-EtOAc gradient as eluent to afford **2**. Yield 155 mg (32%). Calculated for C<sub>51</sub>H<sub>51</sub>N<sub>7</sub>O<sub>3</sub>: [M+H peak]<sup>+</sup> m/z = 809.99, Found: 810.2151; <sup>1</sup>H NMR δ (CDCl<sub>3</sub>, 600 MHz), 8.02 (d, 3H, Ar-H), 7.98 (d, 3H, Ar-H), 7.71 (d, 3H, Ar-H), 7.64 (t, 3H, Ar-H), 7.55 (d, 3H, Ar-H), 7.44 (t, 3H, Ar-H), 7.29 (d, 3H, Ar-H), 6.22 (d, 3H, Ar-H), 6.12 (d, 3H, Ar-H), 3.85 (s, 6H, ArCH<sub>2</sub>), 3.61 (s, 6H, Ar-H), 2.60 (t, 6H, ArCH<sub>2</sub>NCH<sub>2</sub>, J = 5.01 Hz), 2.57 (t, 6H, ArCH<sub>2</sub>NCH<sub>2</sub>CH<sub>2</sub>N, J = 5.1 Hz). <sup>13</sup>C NMR (CDCl<sub>3</sub>, 75 MHz, ppm) δ 50.54, 50.81, 50.82, 108.92, 110.05, 120.05, 120.98, 126.0, 126.32, 127.23, 127.44, 128.49, 128.76, 129.28, 129.49, 136.29, 141.92, 142.23, 147.35, 151.88, 160.18.

### Synthesis of 3:

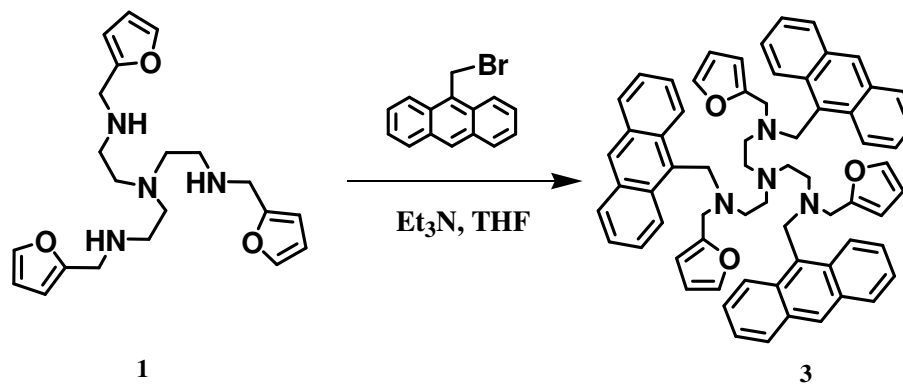

**Scheme 3.** Synthesis of **3**

The Ligand **1** (0.500 g, 0.6 mmol) was dissolved in dry THF (60 mL), anhydrous Et<sub>3</sub>N (0.246 g, 2.4 mmol) was added and the mixture was stirred for an hour at room temperature under nitrogen atmosphere. Freshly prepared 9-Bromomethylanthracene<sup>1</sup> (0.515 g, 19 mmol) was added and the reaction mixture was stirred and refluxed for two-days and allowed to cool to rt, the solvent were removed under vacuum and the residue was extracted with CHCl<sub>3</sub>. The combined organic layers were dried over anhydrous Na<sub>2</sub>SO<sub>4</sub>, evaporated to dryness, washed with diethyl ether, giving a yellowish semi-solid which was purified by Alumina (stationary phase) column chromatography using CHCl<sub>3</sub>-CH<sub>3</sub>OH gradient as eluent to afford **3**. Yield: 212.5 mg (37%). Calculated for C<sub>66</sub>H<sub>60</sub>N<sub>4</sub>O<sub>3</sub>: [M+H peak]<sup>+</sup> *m/z* = 809.99, Found: 810.2151; <sup>1</sup>H NMR δ (CDCl<sub>3</sub>, 300 MHz, ppm), 8.31 (d, 2H, Ar-H), 8.22 (d, 3H, Ar-H), 7.35 (m,

7H, Ar-H), 6.25 (s, 3H, Ar-H), 5.99 (s, 3H, Ar-H), 4.147(S, 2H, ArCH<sub>2</sub>), 3.35 (s, 2H, ArCH<sub>2</sub>), 2.28 (t, 2H, ArCH<sub>2</sub>NCH<sub>2</sub>CH<sub>2</sub>N), 2.12 (t, 2-H, ArCH<sub>2</sub>NCH<sub>2</sub>CH<sub>2</sub>N ). <sup>13</sup>C NMR(CDCl<sub>3</sub>, 75MHz, ppm) δ 50.49, 51.48, 52.61, 60.85, 109.07, 110.67, 121.23, 127.37, 128.18, 128.93, 129.79, 136.55, 142.73, 147.36, 152.55, 160.68.

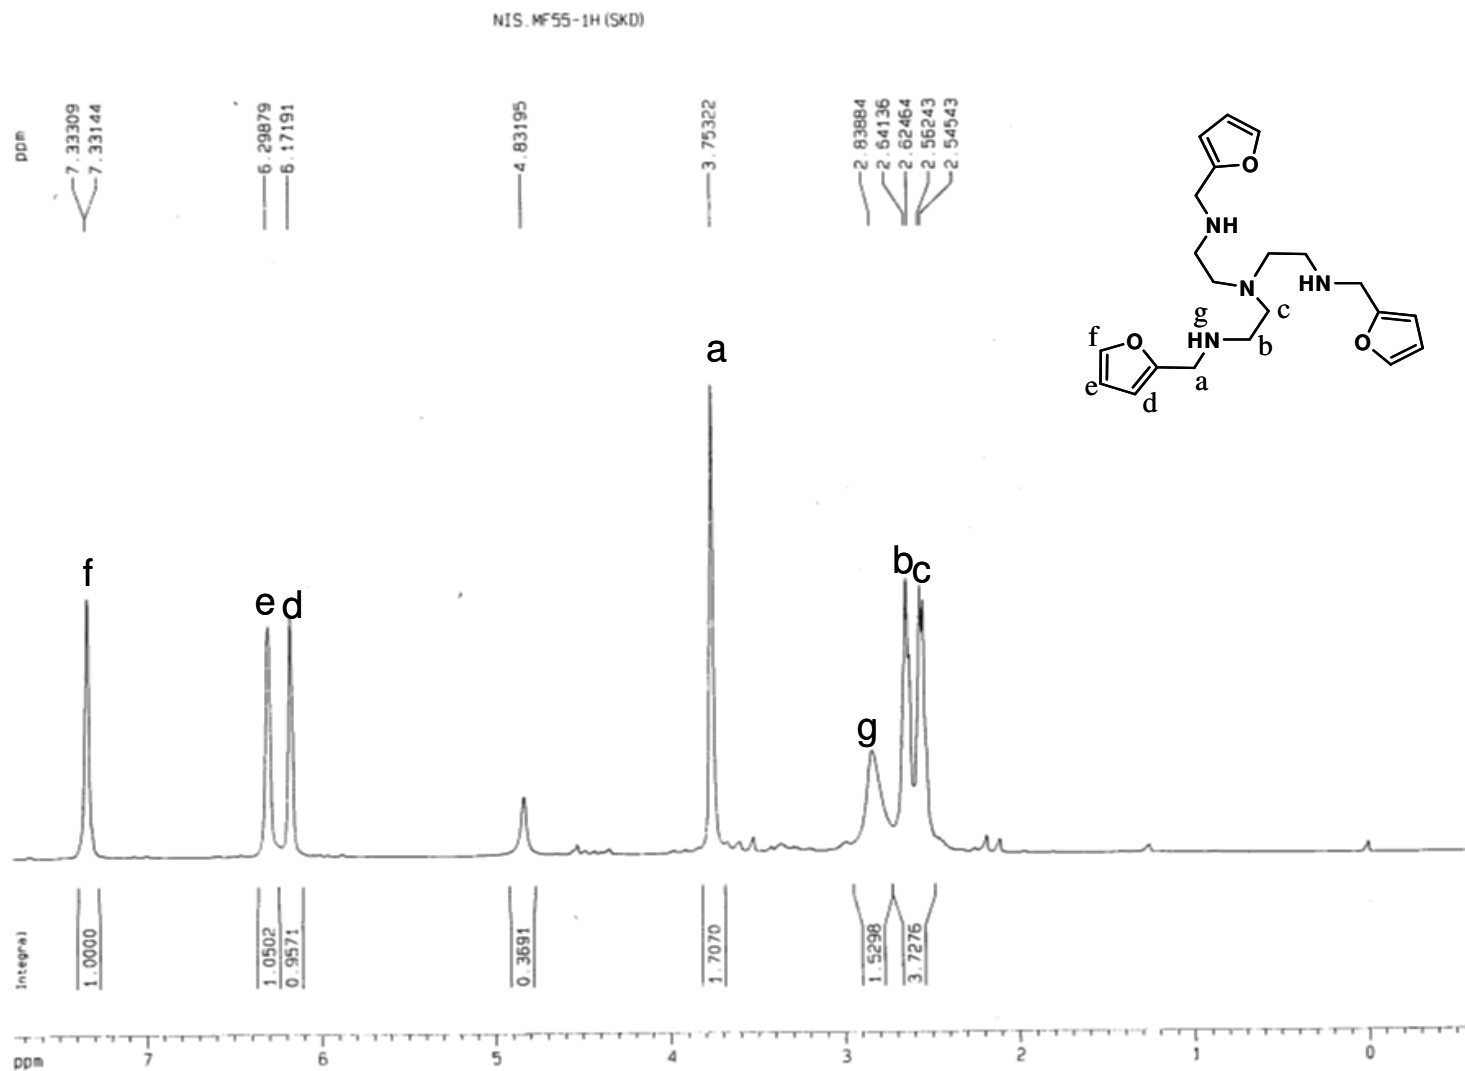

Figure S1. <sup>1</sup>H NMR spectrum of **1** in CDCl<sub>3</sub>

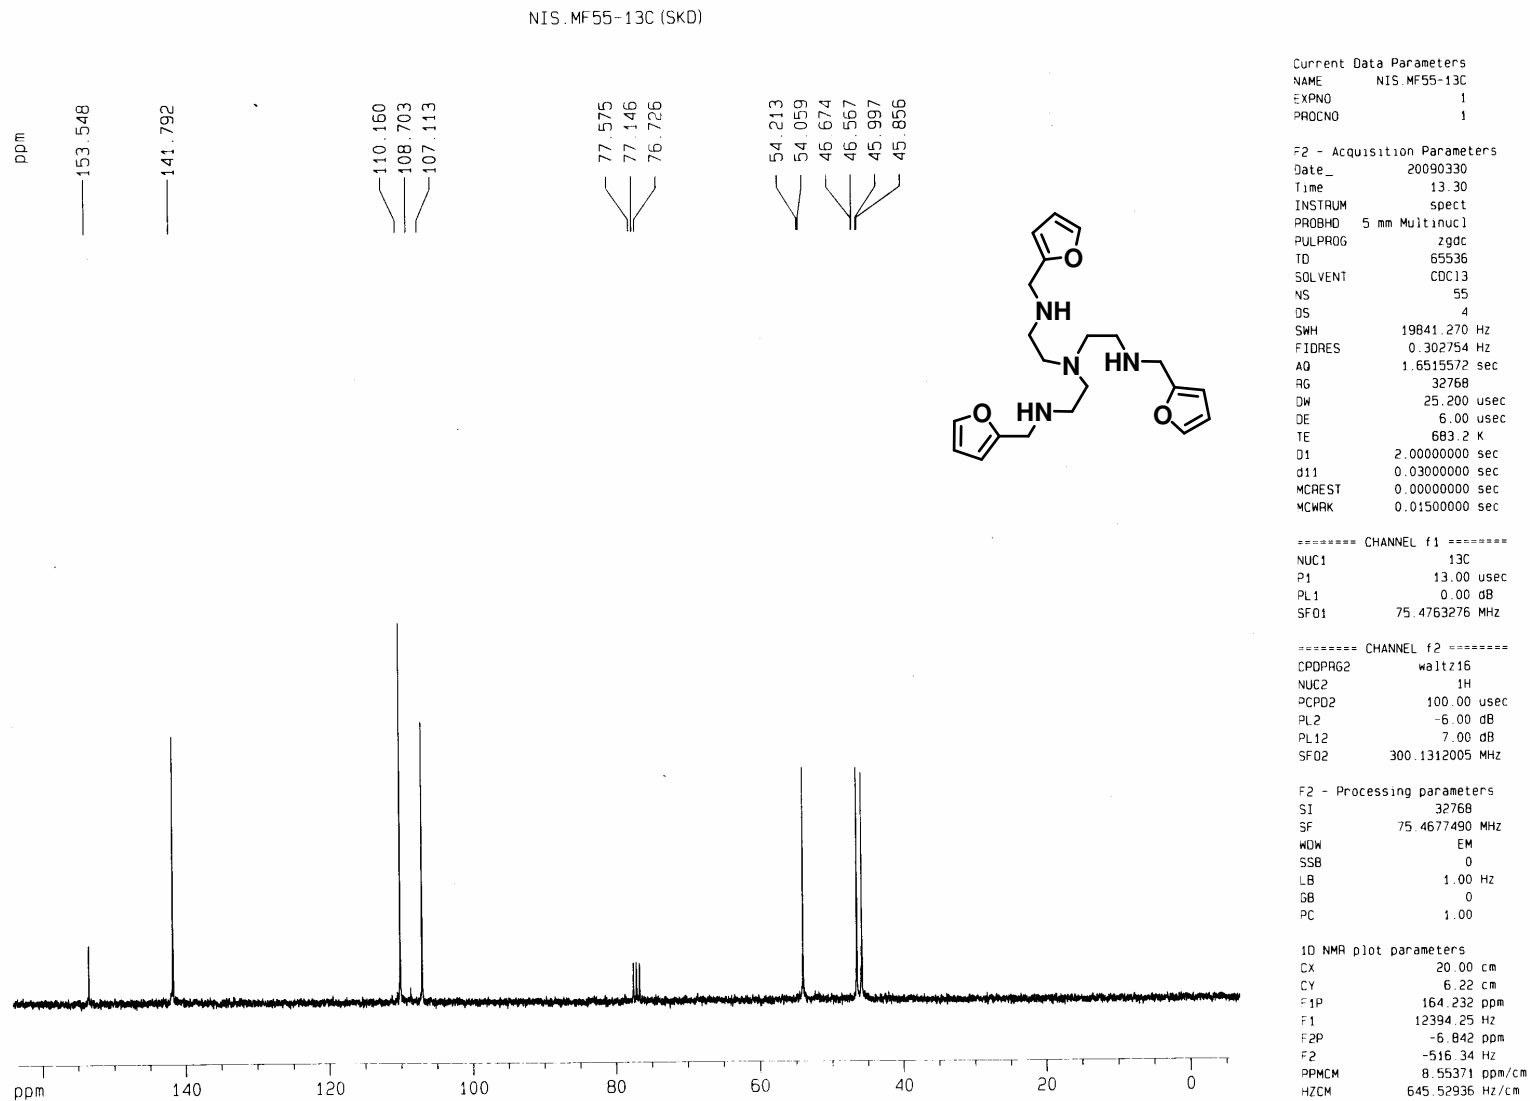

Figure S2.  $^{13}\text{C}$  NMR spectrum of **1** in  $\text{CDCl}_3$





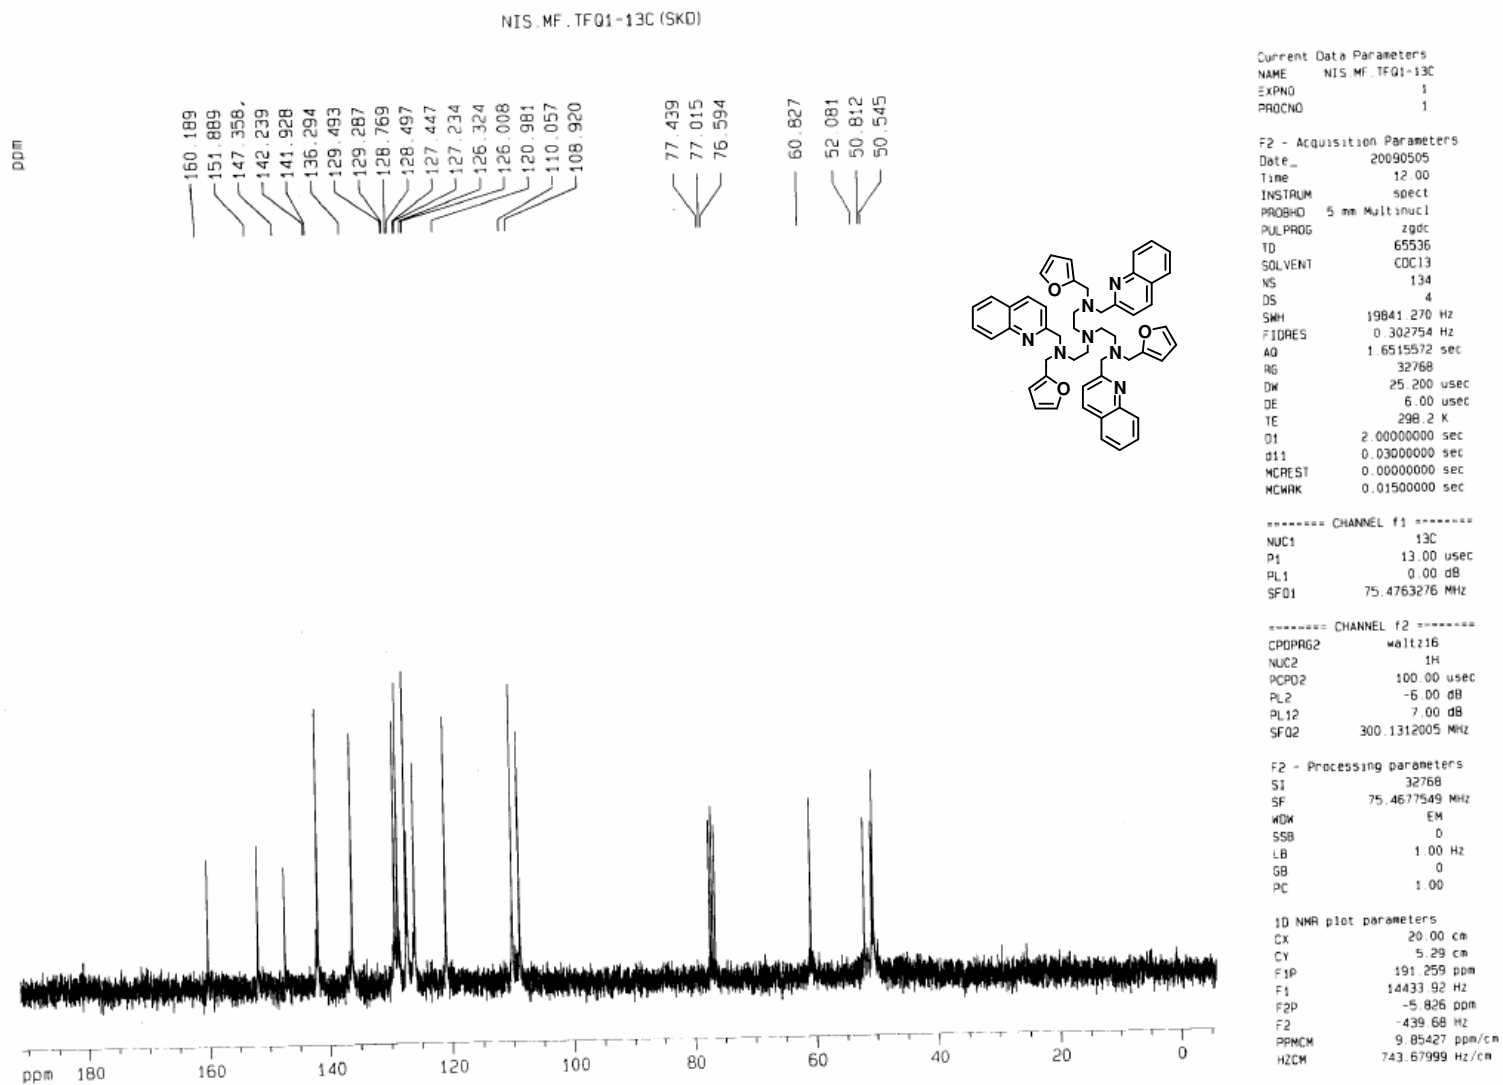

Figure S5.  $^{13}\text{C}$  NMR Spectrum of **2** in  $\text{CDCl}_3$



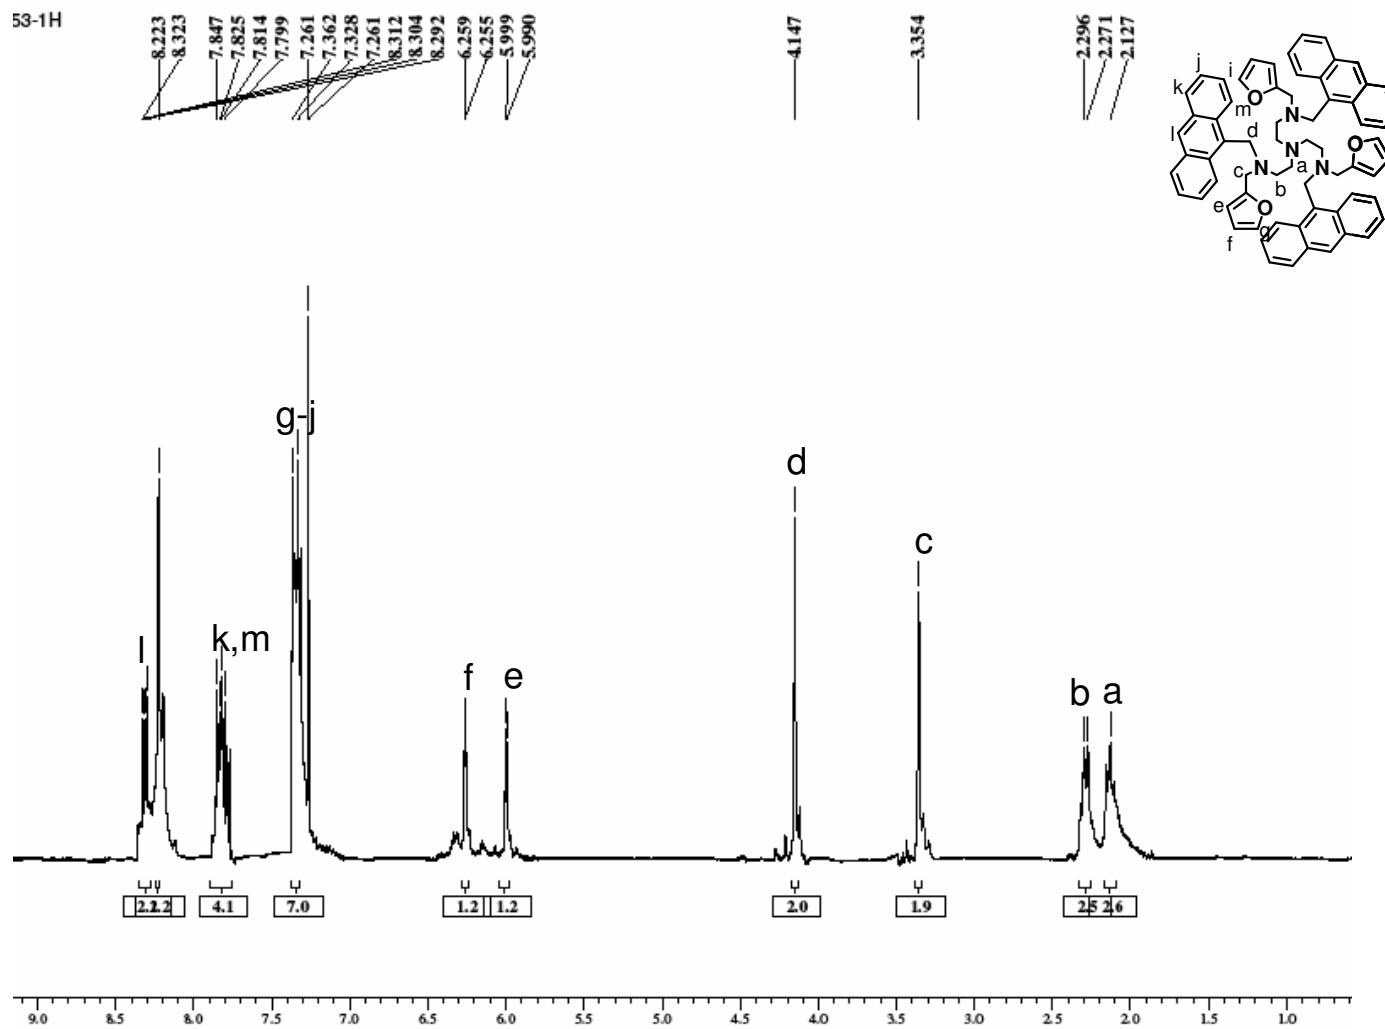

Figure S7. <sup>1</sup>H NMR Spectrum of **3** in CDCl<sub>3</sub>

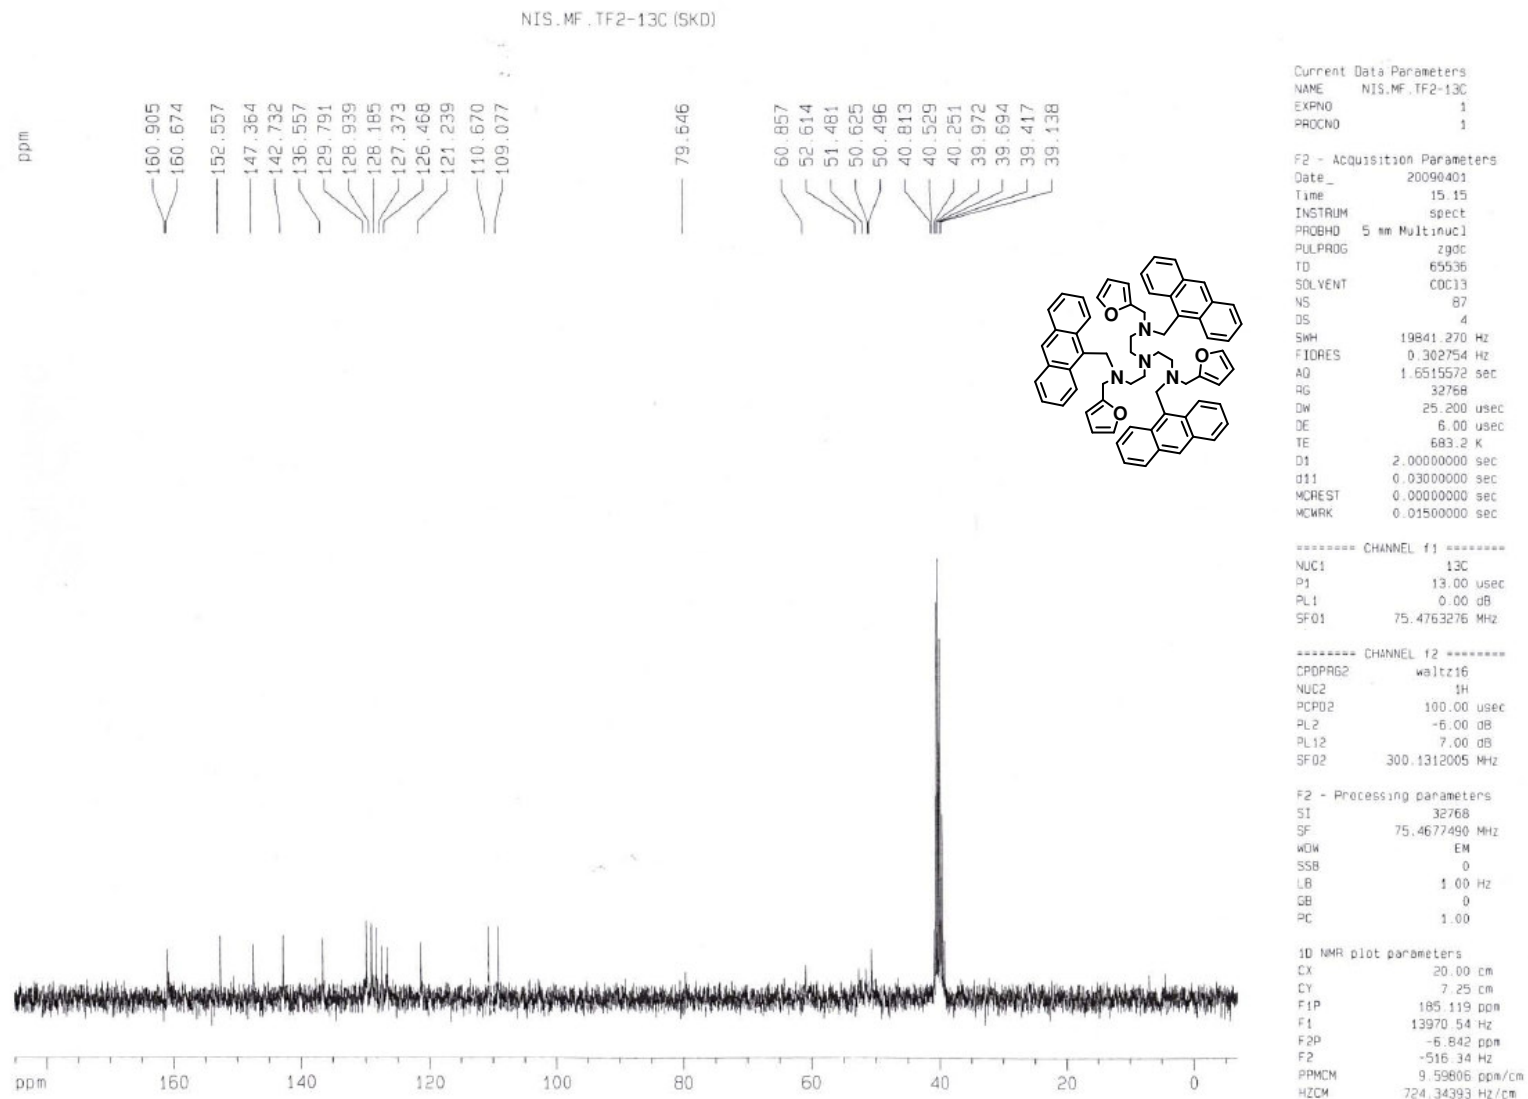

Figure S8.  $^{13}\text{C}$ -NMR spectrum of 3 in DMSO-d<sub>6</sub>

NISMF-53-GB11:20:4209-Apr-2009

QtofMicro

Qtof Micro YA263

NISMF-53 2 (0.020) Sb (5,70.00); Sm (Mn, 20x4.00); Cm (1:6)

TOF MS ES+

100- 191.0375

6.33

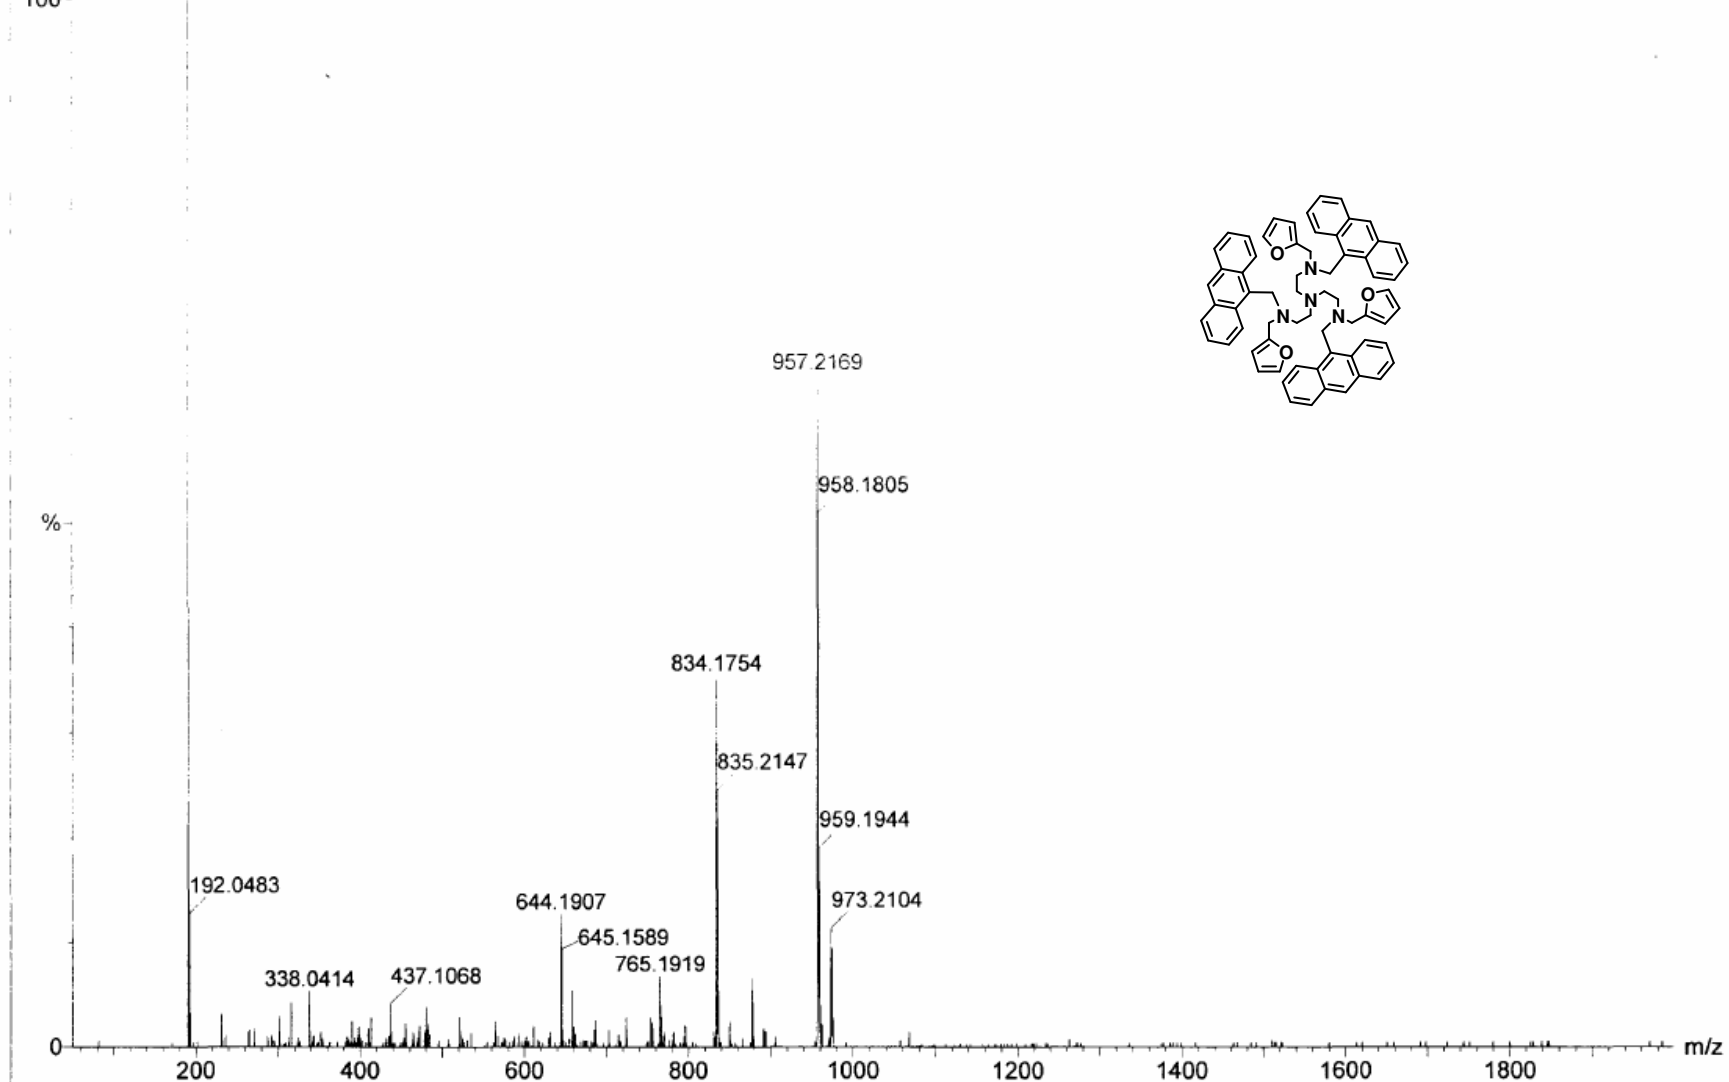

Figure S9. HRMS spectrum of 3

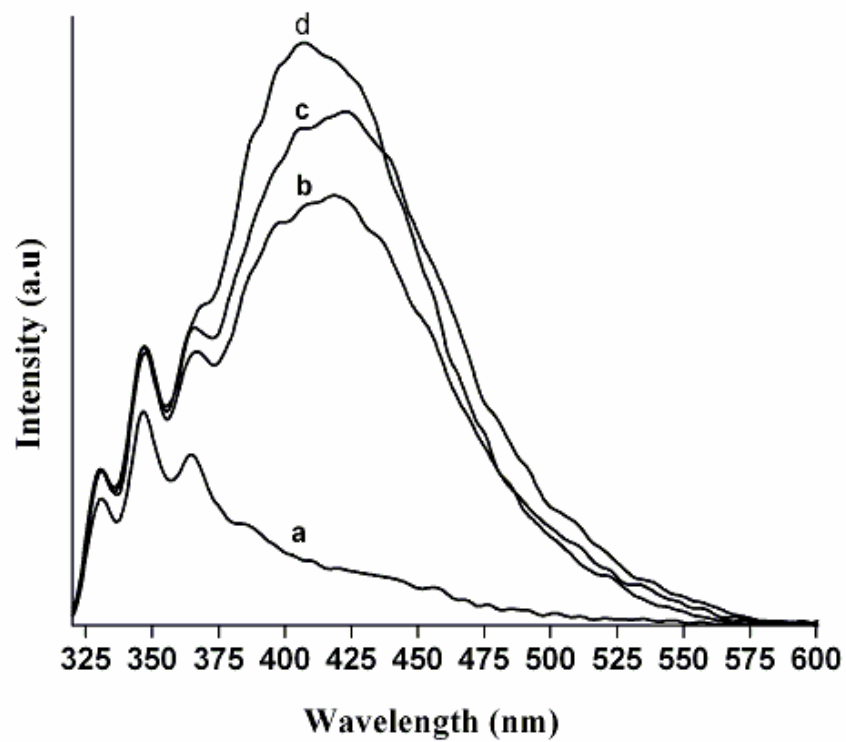

**Figure S10.** Variation of the Emission spectra of (a) **2** ( $5 \times 10^{-6}$  M) in  $\text{CH}_3\text{CN}$ . (b) Upon addition of 100 equiv of  $\text{Hg}^{2+}$  to 'a'. (c) Upon addition of 100 equiv of  $\text{Hg}^{2+}$  and  $\text{Cu}^{2+}$  to 'a.' (d) Upon addition of 100 equiv of  $\text{Hg}^{2+}$  and  $\text{Zn}^{2+}$  to 'a'.  $\lambda_{\text{exc}} = 315$  nm.

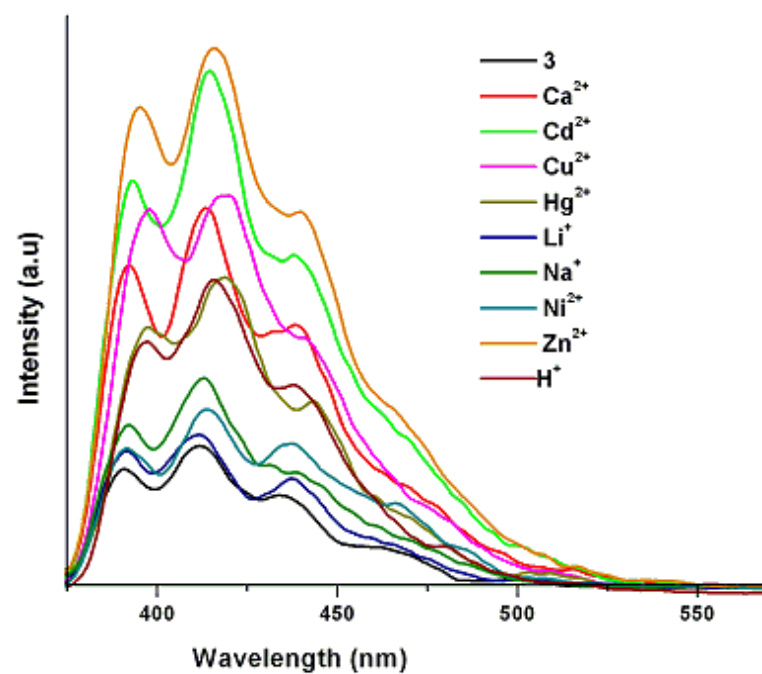

**Figure S11.** Fluorescence response of **3** ( $1 \times 10^{-7}$  M) with different metal ions in THF at 298 K.  $\lambda_{\text{exc}} = 368$  nm.

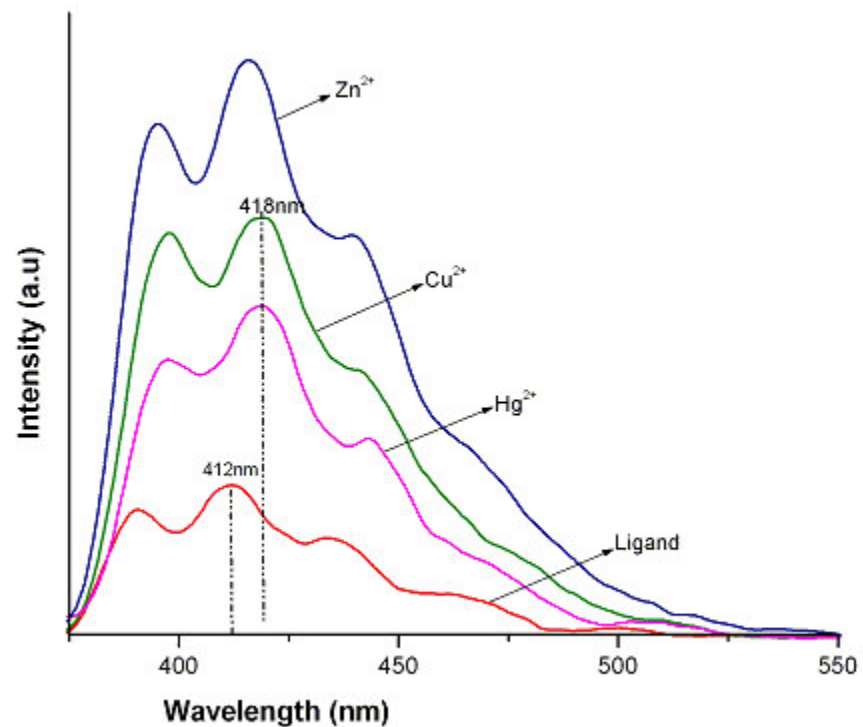

**Figure S12.** Fluorescence response of **3** ( $1 \times 10^{-7}$  M) with 100 equiv of  $\text{Cu}^{2+}$ ,  $\text{Hg}^{2+}$  and  $\text{Zn}^{2+}$  in THF at 298 K with maximum 6 nm spectral shift for the addition of  $\text{Cu}^{2+}$ .  $\lambda_{\text{exc}} = 368$  nm.

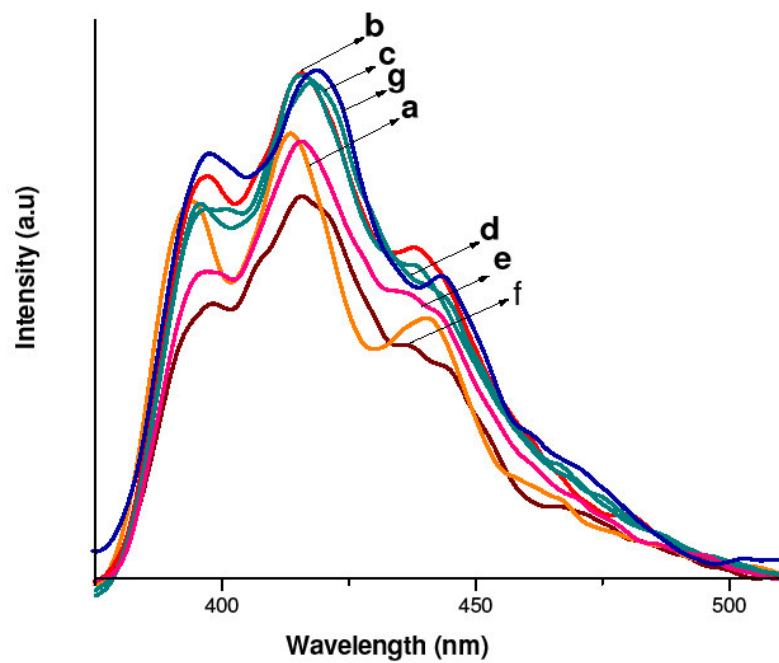

**Figure S13.** Emission spectra of (a) **3** ( $1 \times 10^{-7}$  M) in THF; (b) **3** ( $1 \times 10^{-7}$  M) in THF in presence of 0.02N HCl; (c) Solution 'b' containing of  $4 \times 10^{-6}$  M  $\text{Hg}^{2+}$ ; (d)  $1 \times 10^{-4}$  M  $\text{Hg}^{2+}$ ; (e)  $1 \times 10^{-3}$  M  $\text{Hg}^{2+}$ ; (f)  $1.8 \times 10^{-3}$  M  $\text{Hg}^{2+}$ .  $\lambda_{\text{exc}} = 368$  nm

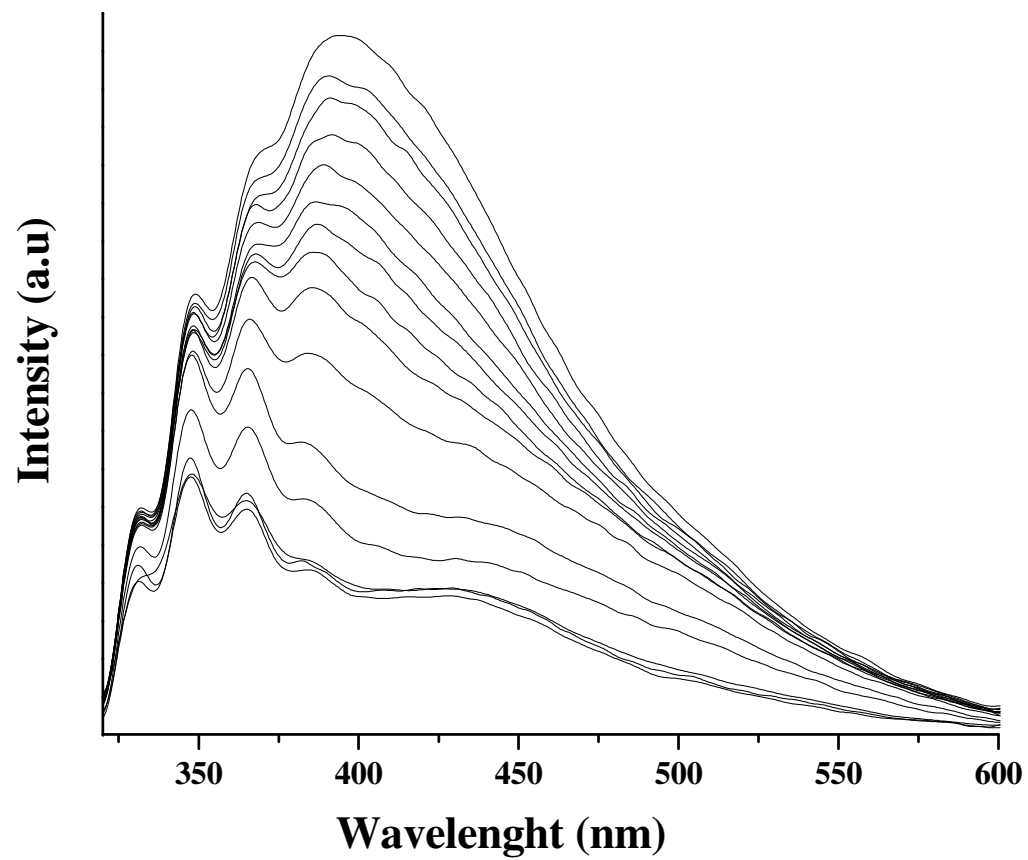

**Figure S14.** Fluorometric titration of **2** ( $5 \times 10^{-6}$  M) with different concentrations of  $\text{Zn}^{2+}$  in  $\text{CH}_3\text{CN}$ .  $\lambda_{\text{exc}} = 315$  nm.

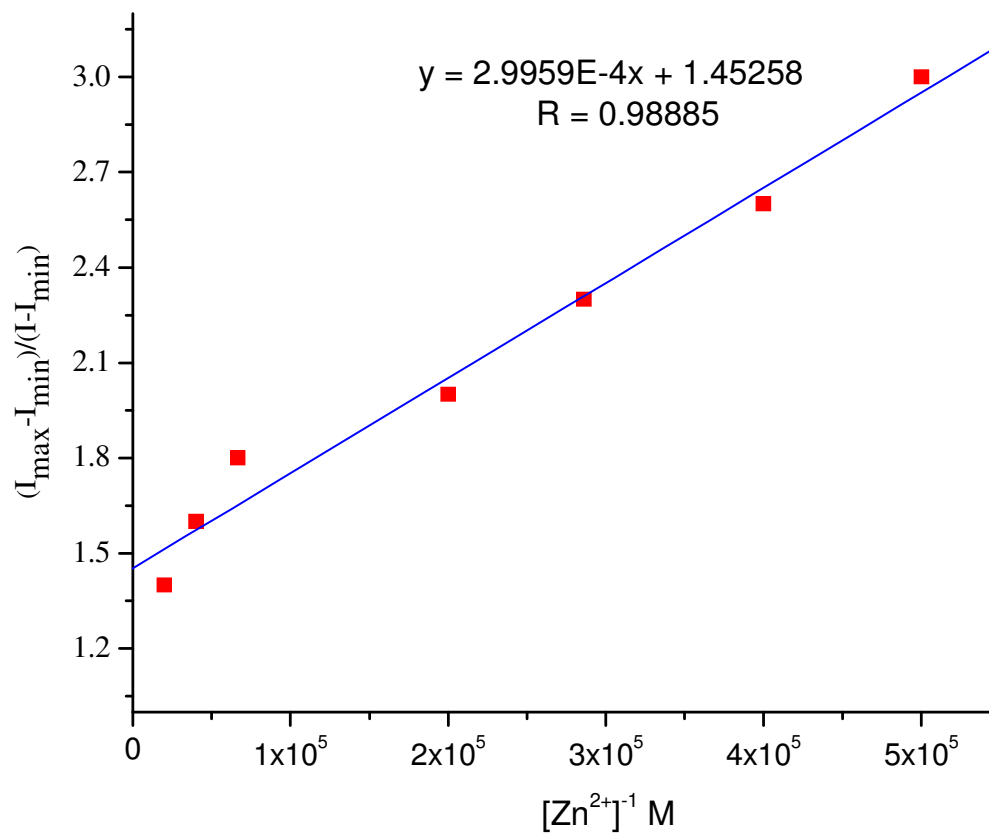

**Figure S15.** Benesi-Hiderband Linear Plot for **2** with different concentrations of Zn(II) at 298 K.  $\lambda_{exc} = 315$  nm.

Plot of  $(I_{max} - I_{min}) / (I - I_{min})$  against  $[Zn^{2+}]^{-1}$  for **2**.

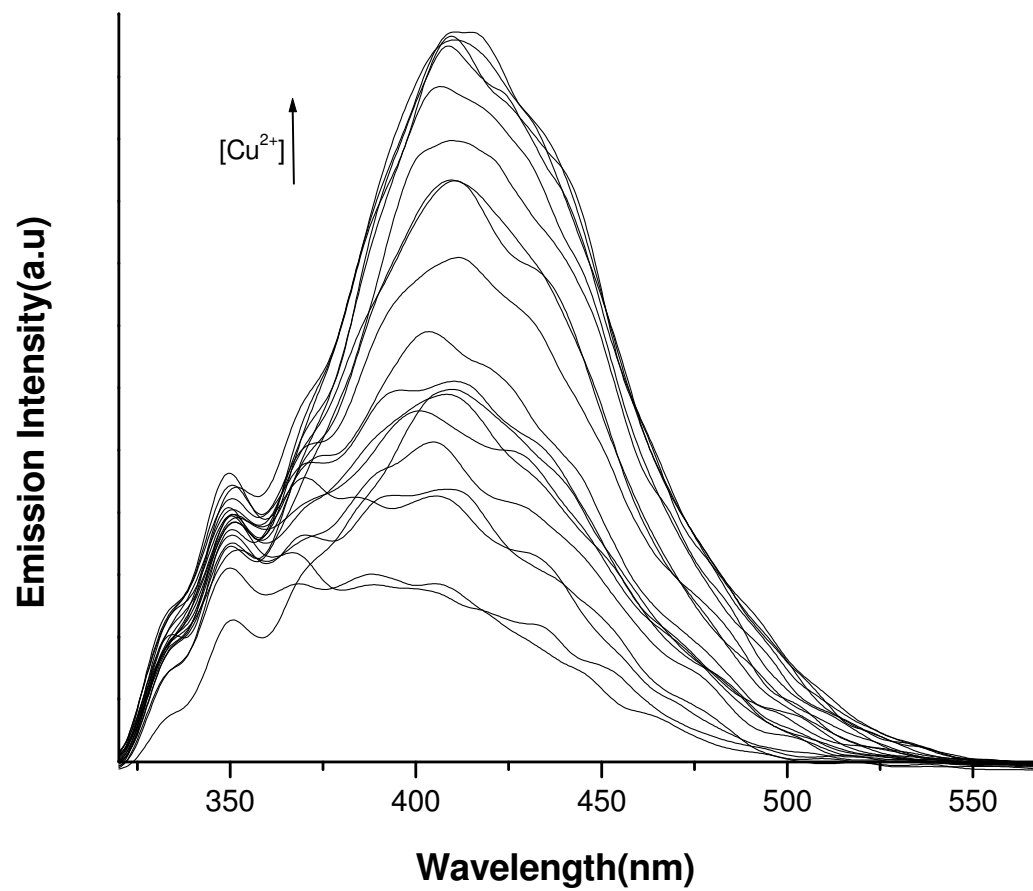

**Figure S16.** Fluorometric titration of **2** ( $5 \times 10^{-6}$  M) with different concentrations of  $\text{Cu}^{2+}$  in  $\text{CH}_3\text{CN}$ .  $\lambda_{\text{exc}} = 315$  nm

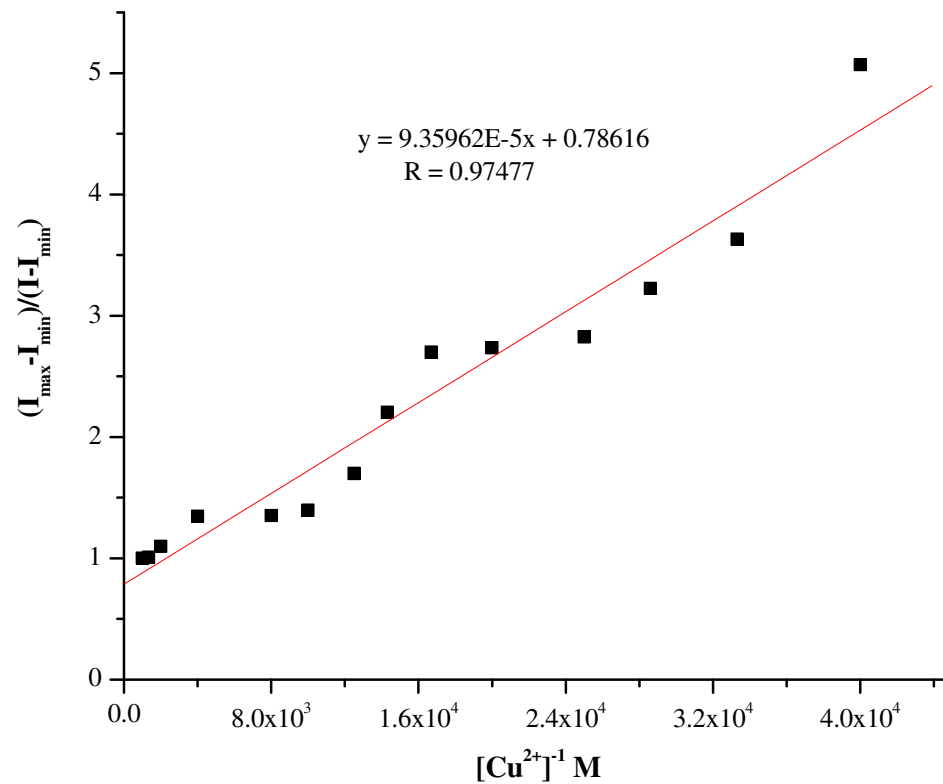

**Figure S17.** Benesi-Hiderband Linear Plot for **2** with different concentrations of Cu(II) at 298 K.  $\lambda_{\text{exc}} = 315 \text{ nm}$ .

Plot of  $(I_{\max} - I_{\min}) / (I - I_{\min})$  against  $[Cu^{2+}]^{-1}$  for **2**

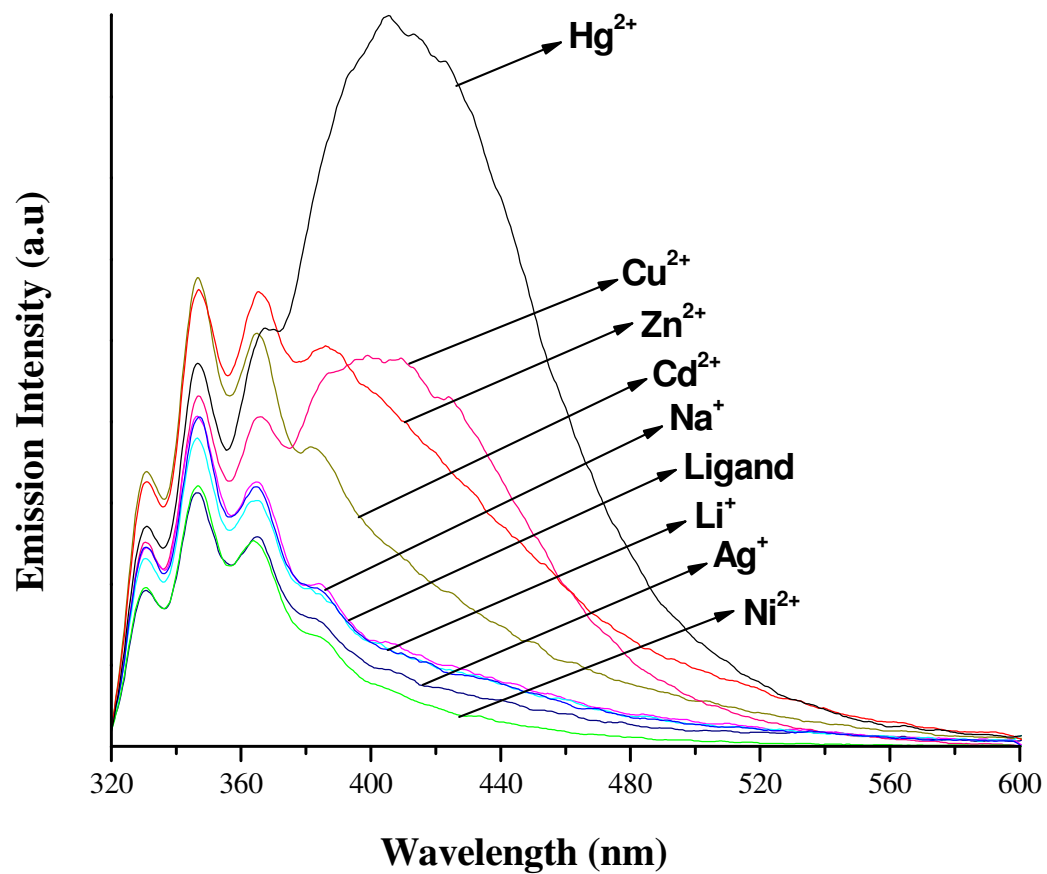

**Figure S18.** Fluorescence response of 2 ( $5 \times 10^{-6}$  M) with 100 equiv. of different metal ions in  $\text{CH}_3\text{CN}:\text{H}_2\text{O}$  (8:2, v/v) at 298 K.  $\lambda_{\text{exc}} = 315$  nm
